# Activation of $\mu$ -Opioid Receptor Induces Expression of *c-fos* and *junB* via Mitogen-activated Protein Kinase Cascade

Takehiro Shoda, M.D.,\* Kazuhiko Fukuda, M.D., Ph.D.,† Hisatoshi Uga, M.D.,‡ Hiroyuki Mima, M.D.,‡ Hitoshi Morikawa, M.D., Ph.D.\*

**Background:** Opioid-induced long-term functional alterations of the nervous system, such as tolerance, addiction, and dependence, conceivably involve changes in gene expression. The authors have previously reported that opioid receptors are functionally coupled to extracellular signal-regulated kinase, a class of the mitogen-activated protein kinase. To address whether activation of the opioid receptor induces changes in gene expression through the activation of extracellular signal-regulated kinase, the authors examined  $\mu$ -opioid receptor (MOR)-induced immediate early gene expression.

**Methods:** Chinese hamster ovary cells stably expressing MOR were used. Cells were stimulated by MOR agonists after 24-h serum starvation. Expression of *c-fos* and *junB* genes was analyzed by RNA blot hybridization. To explore the mechanism of MOR-mediated *c-fos* and *junB* expression, activity of a transcription factor, Elk-1, was assessed by reporter assay. Furthermore, to investigate the functional consequences of *c-fos* and *junB* induction, MOR-mediated formation of the functional transcription factor complex AP-1 was examined by reporter assay and electrophoretic mobility shift assay.

**Results:**  $\mu$ -Opioid receptor activation induced *c-fos* and *junB* messenger RNAs, which were inhibited by pretreatment of the cells with pertussis toxin and PD98059, an inhibitor of extracellular signal-regulated kinase cascade. MOR stimulation elevated Elk-1-mediated transcriptional activity by about 10-fold. AP-1-mediated transcriptional activity was stimulated by MOR agonists by about twofold. Electrophoretic mobility shift assay revealed that AP-1 binding activity in the nuclear extract was elevated by MOR activation and further showed that products of *c-fos* and *junB* genes are involved in formation of AP-1 complex.

**Conclusions:**  $\mu$ -Opioid receptor activation induces *c-fos* and *junB* expression and elevates AP-1-mediated transcriptional activities via the mitogen-activated protein kinase cascade.

THE opioid receptors, classified into  $\mu$ ,  $\delta$ , and  $\kappa$  types on the basis of the differences in binding affinities for ligands, mediate a variety of biologic effects of opioids.<sup>1</sup> In particular, recent studies using knock-out mice show that the  $\mu$ -opioid receptor (MOR) plays a major role in the pharmacologic effects of morphine, the most popular opioid analgesic, such as analgesia, respiratory depression, addiction, physical dependence, and neuroen-

docrine effects.<sup>2,3</sup> At the cellular level, pharmacologic, physiologic, and biochemical studies showed that activation of the opioid receptors induces inhibition of adenylate cyclase, inhibition of voltage-dependent  $\text{Ca}^{2+}$  channels, and activation of inward rectifier  $\text{K}^{+}$  channels.<sup>4</sup> These cellular responses are inhibited by pretreatment with pertussis toxin (PTX), indicating that the opioid receptors are coupled with the PTX-sensitive G-protein ( $\text{G}_i$  or  $\text{G}_o$  or both).

Molecular biologic techniques, including cloning of the complementary DNAs (cDNAs) and expression of the cloned cDNAs in cultured cells, have enabled us to further examine the intracellular signal-transduction mechanisms activated by the opioid receptors.<sup>5</sup> We and other groups have previously demonstrated that extracellular signal-regulated kinase (ERK), a class of the mitogen-activated protein kinases, is activated by the opioid receptors expressed from cloned cDNAs in cultured cells.<sup>6-8</sup> Mitogen-activated protein kinases transmit various stimuli from the cell surface to the cytoplasm and nucleus and are known to be involved in cell proliferation, differentiation, and long-term potentiation in neurons.<sup>9,10</sup> ERK is a serine/threonine kinase that has been shown to affect many aspects of cellular functions by phosphorylating a number of intracellular proteins, including transcription factors, protein kinases, and cytosolic phospholipase  $\text{A}_2$ .<sup>11</sup> Previously, we reported that opioid receptor activation in the presence of A23187, a calcium ionophore, resulted in an increase in arachidonate release, suggesting that  $\text{cPLA}_2$  is activated by the opioid receptors, possibly through phosphorylation by ERK.<sup>6</sup> However, the other opioid-activated cellular responses mediated by mitogen-activated protein kinases have not been thoroughly analyzed.

In the current study we examined opioid-induced immediate early gene expression in cultured cells stably transfected with the cloned MOR cDNA. Our data demonstrate that MOR activation induces expression of the immediate early genes *c-fos* and *junB*, via the PTX-sensitive G-protein and ERK cascade.

## Materials and Methods

### Materials

The CHO cell line stably expressing the cloned rat MOR (CROR-B22 cells) was described previously.<sup>12</sup> The following materials were purchased: [D-Ala<sup>2</sup>, N-Me-Phe<sup>4</sup>, Gly-ol<sup>5</sup>]enkephalin (DAMGO; Peninsula Laborato-

\* Instructor, † Professor and Chair, Department of Anesthesia, Kyoto University Hospital. ‡ Graduate Student, Department of Anesthesia, Kyoto University Graduate School of Medicine.

Received from the Department of Anesthesia, Kyoto University Hospital, Kyoto, Japan. Submitted for publication January 17, 2001. Accepted for publication May 23, 2001. Supported by research grants from the Ministry of Education, Science, and Culture of Japan, Tokyo, Japan. Presented in part at the annual meeting of the American Society of Anesthesiologists, Dallas, Texas, October 13, 1999, and the World Congress of Anaesthesiologists, Montreal, Canada, June 7, 2000.

Address reprint requests to Dr. Fukuda: Department of Anesthesia, Kyoto University Hospital, Shogoin, Sakyo-ku, Kyoto 606-8507, Japan. Address electronic mail to: kfukuda@kuhp.kyoto-u.ac.jp. Individual article reprints may be purchased through the Journal Web site, www.anesthesiology.org.

ries, Belmont, CA); morphine hydrochloride (Takeda, Osaka, Japan); culture medium and TRIzol reagent (GIBCO, Grand Island, NY); bovine calf serum (HyClone, Logan, UT); PTX (Funakoshi, Tokyo, Japan); PD98059 (Calbiochem, La Jolla, CA); [ $\alpha$ - $^{32}$ P]dCTP and [ $\gamma$ - $^{32}$ P]ATP (Amersham-Pharmacia, Uppsala, Sweden); PathDetect Trans- and Cis-Reporting system plasmids (Stratagene, La Jolla, CA); Luciferase Assay System (Promega, Pittsburgh, PA); FuGene 6 Transfection Reagent and  $\beta$ -galactosidase reporter assay system (Roche, Indianapolis, IN); and other reagents (Wako, Osaka, Japan; Nacalai Tesque, Kyoto, Japan; and Sigma, St. Louis, MO).

### Cell Culture

CROR-B22 cells were maintained in minimum essential medium  $\alpha$  containing deoxyribonucleosides and ribonucleosides supplemented with 6% bovine calf serum, penicillin G (50 units/ml), streptomycin sulfate (50  $\mu$ g/ml) and G418 (300  $\mu$ g/ml) in the humidified atmosphere of 95% air and 5% CO<sub>2</sub> at 37°C.

### RNA Blot Hybridization Analysis

CROR-B22 cells were grown to confluence in 60-mm culture dishes, deprived of serum for 24 h, and then stimulated with agonists for the indicated times. After stimulation, total RNA was extracted with use of TRIzol reagent according to the manufacturer's instruction. Total RNAs were analyzed essentially as described previously.<sup>13</sup> The RNAs were electrophoresed in 1% agarose gel and transferred to a nylon membrane (Pall). The hybridization probes for *c-fos* and *junB* were the 0.5-kb-pair *AccI/AvaI* fragment in the fourth exon of the human *c-fos* genome<sup>14</sup> (TaKaRa, Kyoto, Japan) and 1.5-kb-pair *EcoRI* fragment in the mouse *junB* cDNA (kindly provided by Daniel Nathans, M.D., Johns Hopkins University School of Medicine, Baltimore, MD),<sup>15</sup> respectively. The hybridization probe for  $\beta$ -actin was the 0.4-kb-pair *HinfI* fragment of the human  $\beta$ -actin gene<sup>16</sup> (Wako, Osaka, Japan). The probes were labeled with [ $\alpha$ - $^{32}$ P]dCTP by the random primer method.<sup>17</sup> Autoradiography was performed at -80°C with an intensifying screen for 2 days.

### Elk-1- and AP-1-mediated Transcriptional Reporter Assay

CROR-B22 cells were plated at 2 or 3  $\times 10^6$  cells per well in 6-well-plates and incubated for about 24 h before transfection. Transfection was performed with use of the FuGene 6 transfection reagent according to the manufacturer's instruction.

For the Elk-1-mediated transcriptional reporter assay,<sup>18</sup> CROR-B22 cells were transfected with the three expression plasmids of the PathDetect Trans-Reporting system (Stratagene), pFA2-Elk1 (encoding a fusion protein of Gal4 DNA binding domain and Elk-1 transactivation domain), pFR-Luc (constructed by cloning the entire coding sequence of the firefly luciferase downstream of a

basic promoter element, TATA box, and joined to five tandem repeats of the 17-bp Gal4 binding element), and pSV $\beta$ gal (encoding the *Escherichia coli*  $\beta$ -galactosidase). To perform the AP-1-mediated transcriptional reporter assay,<sup>19</sup> cells were transfected with the two expression plasmids of the PathDetect Cis-Reporting system, pAP1-Luc (constructed by cloning the entire coding sequence of the firefly luciferase downstream of a TATA box and joined to seven tandem repeats of the 7-bp AP-1 binding element) and pSV $\beta$ gal.

At 24 h after transfection, incubation medium was replaced with serum-free minimum essential medium  $\alpha$ , and the cells were incubated for a further 24 h. After serum starvation, cells were stimulated with 1  $\mu$ M MOR agonists for 5 h at 37°C and washed twice with phosphate-buffered saline. The luciferase and  $\beta$ -galactosidase activity in the cell lysate was measured by the Luciferase Assay System and  $\beta$ -galactosidase reporter assay system, respectively. The luciferase activity reflects Elk-1- or AP-1-mediated transcriptional activity. The  $\beta$ -galactosidase activity is measured to compare the transfection efficiency between experiments. The luciferase activity was normalized to each  $\beta$ -galactosidase activity.

### Electrophoretic Mobility Shift Assay

CROR-B22 cells were grown to confluence in 100-mm dishes, serum-starved for 24 h, and stimulated by 1  $\mu$ M agonists for 60 min at 37°C. Then cells were washed twice with phosphate-buffered saline, suspended in hypotonic buffer A [10 mM HEPES (pH, 7.6), 15 mM KCl, 2 mM MgCl<sub>2</sub>, 0.1 mM EDTA, 1 mM dithiothreitol (DTT), 1 mM phenylmethylsulfonyl fluoride (PMSF), 5  $\mu$ g/ml leupeptin, 5  $\mu$ g/ml aprotinin, and 1  $\mu$ g/ml pepstatin A], and centrifuged for 20 s at 800g. The pellet was lysed with buffer A added with 0.2% Nonidet P-40 and was centrifuged for 20 s at 800g. The resulting pellet was resuspended in buffer A added with 250 mM sucrose and was centrifuged for 20 s at 800g to collect nuclei. From the nuclear pellet, nuclear extracts were eluted in buffer B [50 mM HEPES (pH, 7.9), 400 mM KCl, 0.1 mM EDTA, 10% glycerol, 1 mM DTT, 1 mM PMSF, 5  $\mu$ g/ml leupeptin, 5  $\mu$ g/ml aprotinin, and 1  $\mu$ g/ml pepstatin A].

The electrophoretic mobility shift assay was carried out essentially as described previously.<sup>20</sup> The AP-1 binding probe was created by annealing synthetic oligonucleotides, forward (5'-CGCTTGATGAGTCAGCCGGA-3') and reverse (5'-TTCCGGCTGACTCATCAAGCG-3'). The annealed probe was 5'-end-labeled with T4 polynucleotide kinase and [ $\gamma$ - $^{32}$ P]ATP. The nuclear extract was incubated with the  $^{32}$ P-labeled probe at room temperature for 15 min. For supershift assay, the nuclear extract was preincubated with c-Fos, JunB- or c-Jun-specific antibody for 60 min on ice before addition of the  $^{32}$ P-labeled probe. The samples were electrophoresed in 4% acrylamide gel. The gel was then dried and autoradiographed with an intensifying screen at -80°C for 2 days.

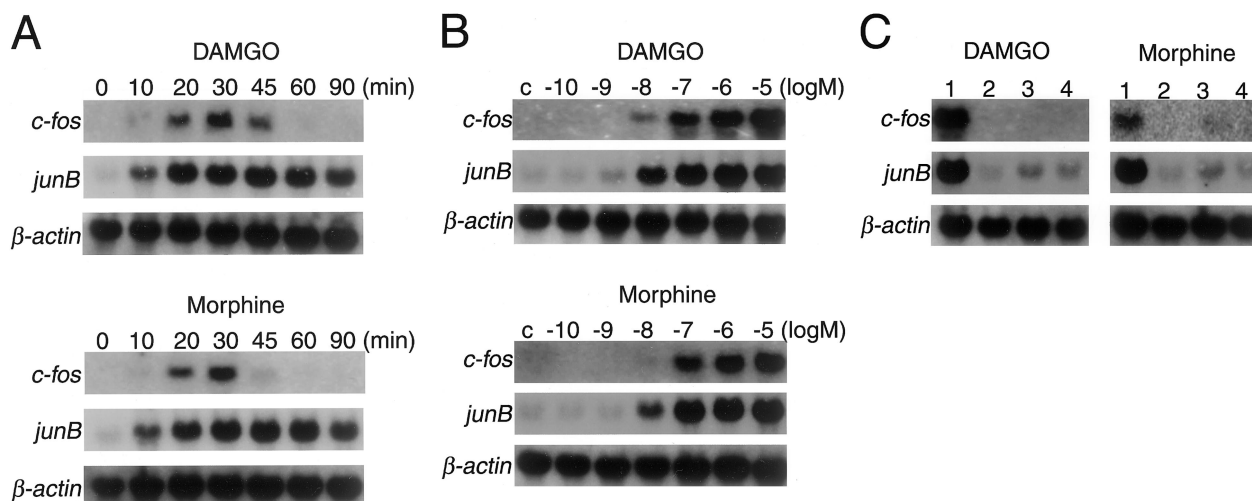

**Fig. 1.**  $\mu$ -Opioid receptor (MOR)-mediated *c-fos* and *junB* mRNA expression. Intensities of the  $\beta$ -actin mRNA bands indicate that a nearly equal amount of RNA was loaded in each lane. (A) Time course of *c-fos* and *junB* mRNA expression after 1  $\mu$ M agonist exposure. (B) Dose-response relation for *c-fos* and *junB* mRNA expression induced by 30-min exposure to the agonists. Lane c is nonstimulation control. (C) Pharmacologic analysis of MOR-mediated *c-fos* and *junB* mRNA expression. After pretreatment with vehicle (lanes 1 and 4), PTX (100 ng/ml; 24 h) (lane 2), or PD98059 (50  $\mu$ M; 2 h) (lane 3), cells were stimulated with 1  $\mu$ M agonists for 30 min in the absence (lanes 1, 2, and 3) or presence of 1  $\mu$ M naloxone (lane 4). DAMGO = [D-Ala<sup>2</sup>,N-Me-Phe<sup>4</sup>,Gly-ol<sup>5</sup>]enkephalin.

#### Statistical Analysis

Data are expressed as mean  $\pm$  SD. Statistical analyses of data were performed by one-way analysis of variance, with *post hoc* comparison by means of the Dunnett test. Values of  $P < 0.05$  were considered statistically significant.

## Results

#### MOR-mediated Immediate Early Gene Expression

First, we tested whether MOR activation induces immediate early gene expression by RNA blot hybridization analysis. CROR-B22 cells, CHO cells transformed to express the cloned rat MOR, were stimulated with morphine, an opioid alkaloid agonist acting primarily on MOR, and DAMGO, a synthetic peptide agonist selective for MOR. After agonist stimulation, MOR-mediated *c-fos* messenger RNA (mRNA) expression appeared at 10 min, peaked at 30 min, thereafter declined gradually, and returned to the control level by 90 min (fig. 1A). Expression of *junB* was also induced by activation of MOR, although the time course of expression was quite different from that of *c-fos* expression. The band of *junB* mRNA appeared at 10 min and peaked at 30 min but was still remarkable at 90 min after agonist exposure (fig. 1A). The *c-fos* and *junB* expression was dependent on agonist concentration (fig. 1B), antagonized by naloxone, and inhibited by pretreatment with PTX or PD98059, an inhibitor of the mitogen-activated protein kinase/ERK kinase (MEK)-1, which activates ERKs by phosphorylation (fig. 1C). Thus, our results demonstrate that MOR activation induces transcription of *c-fos* and *junB* genes *via* the PTX-sensitive G-protein ( $G_i$  or  $G_o$  or both) and ERK cascade.

#### MOR-mediated Elk-1 Activation

To elucidate the mechanism of MOR-mediated *c-fos* and *junB* transcription *via* ERK cascade, we tested the involvement of a transcription factor, Elk-1, in the MOR signaling pathway, because it has been suggested that Elk-1 phosphorylated by ERK contributes to growth hormone-stimulated *c-fos* and *junB* expression.<sup>21</sup> CROR-B22 cells were transiently cotransfected with the plasmid encoding Gal4/Elk-1 fusion protein and the plasmid containing luciferase-coding DNA sequence linked with Gal4 binding region. If a serine residue (383Ser) in the Elk-1 region of the Gal4/Elk-1 fusion protein is phosphorylated in the cells, the fusion protein binds to the Gal4 binding region upstream of the luciferase-coding sequence, resulting in an increase in production of luciferase mRNA and protein. Figure 2 shows that stimulation of MOR by agonists, DAMGO and morphine, enhanced Elk-1-mediated transcriptional activation of the luciferase reporter gene by about 10-fold, and this activation was inhibited by pretreatment of the cells with PTX and PD98059. This result indicates that stimulation of MOR induces activation of Elk-1, through the action of the PTX-sensitive G-protein and ERK cascade.

#### MOR-mediated AP-1 Formation

Immediate early gene products belonging to the Fos and Jun families form the dimer AP-1 complex, which activates transcription of a variety of genes by binding to the specific AP-1 binding site located in the 5'-flanking region of the gene. Therefore, we expected that MOR activation could stimulate AP-1-mediated transcriptional activation. CROR-B22 cells were transiently transfected with the plasmid containing luciferase reporter gene linked with seven tandem repeats of AP-1 binding ele-



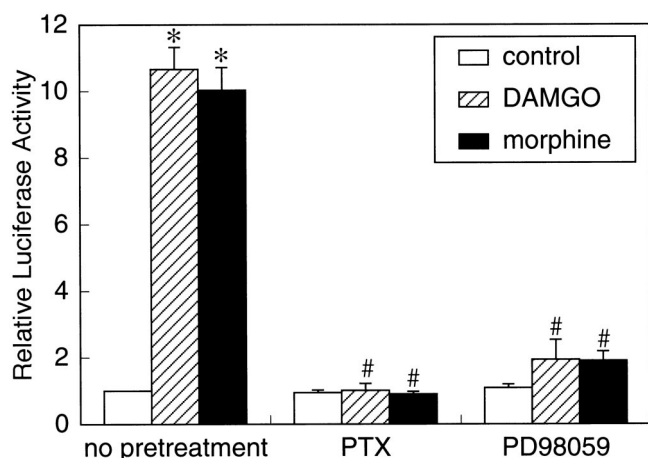

Fig. 2.  $\mu$ -Opioid receptor (MOR) activation induces Elk-1-mediated transcription. Cells were pretreated with pertussis toxin (PTX; 100 ng/ml; 24 h) or PD98059 (50  $\mu$ M; 2 h), and then stimulated with 1  $\mu$ M [D-Ala<sup>2</sup>,N-Me-Phe<sup>4</sup>,Gly-ol<sup>5</sup>]enkephalin (DAMGO) or 1  $\mu$ M morphine. The ratio of normalized luciferase activity to that of nonstimulated control cells is expressed as mean  $\pm$  SD from three separate experiments done in duplicate (\* $P$  < 0.05 vs. nonstimulated control; # $P$  < 0.05 vs. cells stimulated by the same agonist without pretreatment).

ments, and MOR-mediated luciferase transactivation was measured. As shown in figure 3, MOR activation by agonists stimulated AP-1-mediated transcriptional activity by about twofold, and this activation was inhibited by pretreatment with PTX or PD98059.

Finally, to confirm that c-Fos and JunB expressed by MOR activation indeed form the functional AP-1 complex that can bind with the AP-1 binding sequence, electrophoretic mobility shift assay was performed with use of nuclear extract prepared from agonist-stimulated CROR-B22 cells and the <sup>32</sup>P-end-labeled probe containing a consensus AP-1 binding sequence. Figure 4 demonstrates that MOR activation by agonists induces an increase in the binding of the nuclear protein with the AP-1 probe. This suggests that c-Fos and JunB expressed by MOR activation form the AP-1 complex that can bind with the consensus sequence. Similar to the MOR-mediated c-fos and junB mRNA induction, MOR-mediated binding of the AP-1 to the probe was sensitive to PTX and PD98059 (fig. 4A), suggesting the involvement of the PTX-sensitive G-protein and ERK cascade. Supershift assay (fig. 4B) shows that preincubation of the nuclear extract with anti-c-Fos, anti-JunB, or anti-c-Jun antibodies reduces the electrophoretic mobility of the complex of the nuclear protein and the AP-1 binding probe, suggesting that c-Fos, JunB, and c-Jun are involved in the MOR-mediated formation of the AP-1 complex.

## Discussion

In the current investigation we demonstrated that MOR activation induces expression of the immediate early genes c-fos and junB via the PTX-sensitive G-

protein and ERK cascade, and possibly through the action of the transcription factor Elk-1. Furthermore, the induced immediate early gene products, c-Fos and JunB, are shown to participate in formation of functional AP-1 complex, which can induce expression of other genes. These results are schematically depicted in figure 5. Although further study is necessary to elucidate which genes are activated by this MOR-mediated signal transduction mechanism *in vivo* and in CHO cells, it is possible that MOR-mediated gene expression takes part in long-term pharmacologic effects of opioids, such as tolerance and addiction.

We used a CHO cell line, CROR-B22, permanently transfected with the cloned rat MOR cDNA. This cell line expresses MOR at the level of approximately 10 pmol/mg protein,<sup>6</sup> which is much higher than the expression level of MOR in the brain.<sup>22</sup> The native opioid receptors are predominantly expressed in neuronal cells in the central nervous system.<sup>23</sup> In contrast, CHO cells, which do not endogenously express opioid receptors,<sup>24</sup> are derived from Chinese hamster ovary and do not have neuronal lineage. Therefore, it may be difficult to completely exclude the possibility that MOR expressed in CHO cells is coupled with the signal transduction mechanism, different from that activated by the opioid receptor in the neuronal cells. However, a heterologous expression system using cloned cDNAs has provided a powerful tool for studying the signal transduction mechanism activated by a receptor existing poorly in the neuronal cells, because we can use cultured cells expressing the receptor in a high density.<sup>25</sup> As a next step, we should test whether the MOR-mediated re-

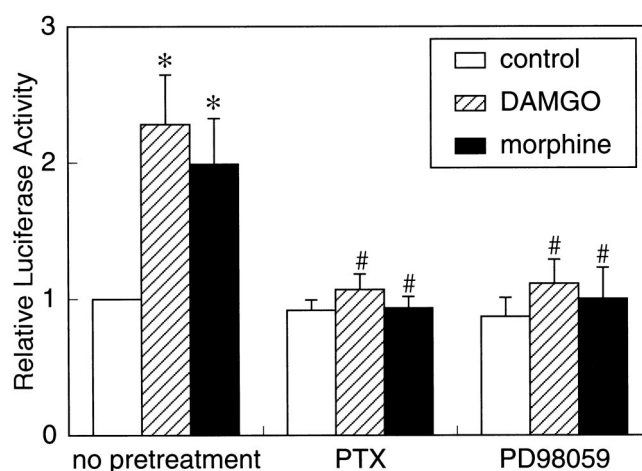

Fig. 3.  $\mu$ -Opioid receptor (MOR) activation induces AP-1-mediated transcription. Cells were pretreated and stimulated in a manner similar to that described in the figure 2 legend. The ratio of normalized luciferase activity to that of nonstimulated control cells is expressed as mean  $\pm$  SD from three separate experiments done in duplicate (\* $P$  < 0.05 vs. nonstimulated control; # $P$  < 0.05 vs. cells stimulated by the same agonist without pretreatment). DAMGO = [D-Ala<sup>2</sup>,N-Me-Phe<sup>4</sup>,Gly-ol<sup>5</sup>]enkephalin; PTX = pertussis toxin.

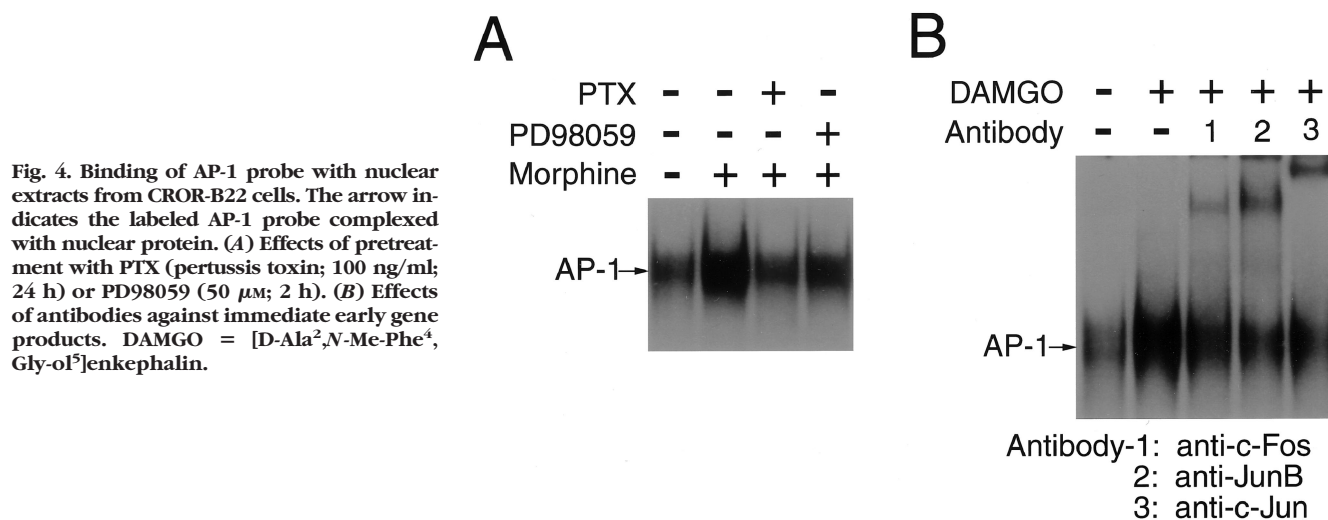

Fig. 4. Binding of AP-1 probe with nuclear extracts from CROR-B22 cells. The arrow indicates the labeled AP-1 probe complexed with nuclear protein. (A) Effects of pretreatment with PTX (pertussis toxin; 100 ng/ml; 24 h) or PD98059 (50  $\mu$ M; 2 h). (B) Effects of antibodies against immediate early gene products. DAMGO = [D-Ala<sup>2</sup>,N-Me-Phe<sup>4</sup>,Gly-ol<sup>5</sup>]enkephalin.

sponses observed in CHO cells are also elicited in neuronal cells.

Our data demonstrate that stimulation of MOR induces transcriptional activation mediated by Elk-1, a transcription factor belonging to the ternary complex factor family.<sup>26</sup> Phosphorylated Elk-1 forms a complex with the serum response factor, another transcription factor, and binds to the serum response element of the genes, resulting in transcriptional activation. Serum response elements exist in the promoter of the *c-fos* gene<sup>27</sup> as well as in that of the *junB* gene.<sup>15,28</sup> Therefore, it is possible that MOR-induced expression of *c-fos* and *junB* mRNAs involve activation of Elk-1-mediated transcription. However, involvement of transcription factors other than Elk-1 cannot be excluded. For example, serine phosphorylation, possibly mediated by ERKs, is thought to contribute to transcriptional activation mediated by a transcription factor, STAT (signal transducer and activa-

tor of transcription),<sup>29</sup> which can bind to the *sis*-inducible element in the *c-fos* promoter.<sup>30</sup> Further study will be necessary to clarify whether the transcription factor STAT is involved in opioid-activated gene expression *via* ERK cascade.

There have been several reports that morphine induces immediate early gene expression *in vivo*. Chang *et al.*<sup>31</sup> demonstrated that *c-fos* mRNA levels in rat caudate putamen were increased at 45 min and returned to control level at 90 min after injection with morphine sulfate (10 mg/kg). Garcia *et al.*<sup>32</sup> showed induction of immediate early gene products, c-Fos, JunB, c-Jun, and a Jun-related antigen, in specific regions of the rat forebrain by acute morphine administration (10 mg/kg). However, they neither investigated the molecular mechanism of the induction nor clarified whether the immediate early gene induction was the result of direct or indirect effect of morphine. In fact, it was reported that

Fig. 5. Signal transduction from  $\mu$ -opioid receptor (MOR) activation to gene expression. The activated G<sub>i</sub> or G<sub>o</sub> proteins induce extracellular signal-regulated kinase (ERK) activation through the cascade including Ras, Raf-1, and the mitogen-activated protein kinase/ERK kinase (MEK). It is suggested that ERK induces *c-fos* and *junB* transcription by phosphorylating a transcription factor Elk-1. The products of *c-fos* and *junB* participate in formation of AP-1 complex, and induce transcription of other genes. PTX (pertussis toxin) and PD98059 block the signal transduction pathway by affecting the G-protein and MEK, respectively. SRF = serum response factor; SRE = serum response element.

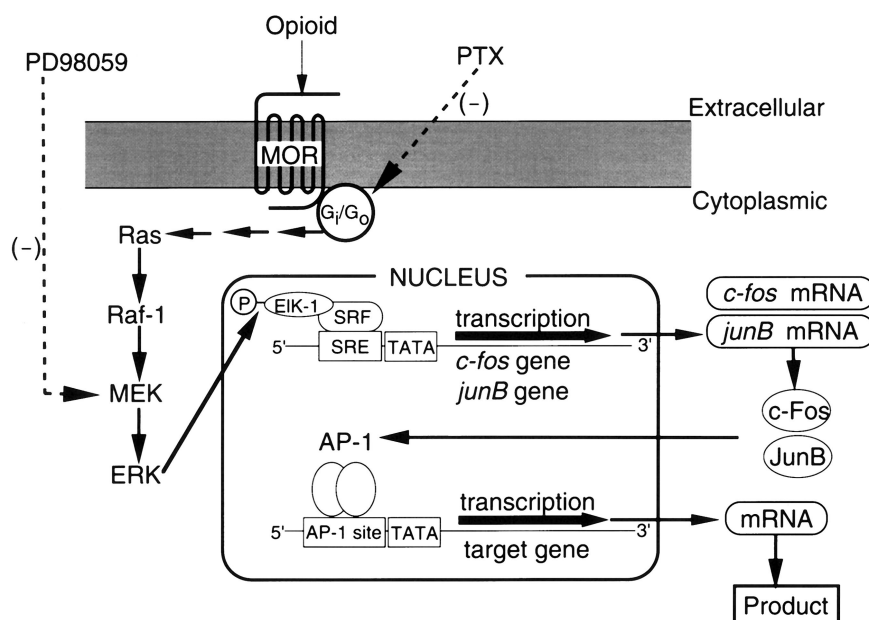

intraperitoneal injection of morphine (10 mg/kg) induces expression of *c-fos* and *junB* in rat striatum and nucleus accumbens and that this immediate early gene induction by MOR is mediated by dopamine D<sub>1</sub> and N-methyl-D-aspartate receptors.<sup>33</sup> In contrast, we showed in the current investigation that immediate early gene expression can be directly induced by acute opioid exposure in MOR-expressing cells. It remains to be elucidated whether the mechanism we showed here is relevant in the mammalian central nervous system.

AP-1 complex is a transcriptional activator dimer composed of transcriptional factors belonging to the Fos (c-Fos, FosB, Fra-1, and Fra-2) and Jun (c-Jun, JunB, and JunD) families.<sup>34</sup> Our data showed that MOR stimulation induces AP-1-mediated transcriptional activity and increases binding of nuclear protein to the AP-1 probe. Moreover, we demonstrated that c-Fos, JunB, and c-Jun participate in forming the AP-1 complex. Together, it is conceivable that c-Fos and JunB, the expression of which is induced by MOR activation *via* the PTX-sensitive G-protein and ERK cascade, can form functional AP-1 complex and induce expression of other proteins. The involvement of AP-1 complex in opioid-induced alteration of gene expression *in vivo* has not been shown previously. However, it is possible that opioid-induced AP-1 complex formation contributes to physiologic responses to opioids *in vivo*. The genes encoding opioid peptide precursors, including proopiomelanocortin, preproenkephalin, and prodynorphin, are known to contain AP-1 binding sites.<sup>35–37</sup> It has been shown that expression of preproenkephalin and prodynorphin is suppressed during prolonged morphine administration.<sup>38,39</sup> On the other hand, Chang *et al.*<sup>40</sup> demonstrated that repeated morphine exposure causes significant induction of proopiomelanocortin mRNA in SH-SY5Y human neuroblastoma cells. Opioid-induced AP-1 formation, which was demonstrated in the current study, might be the molecular basis of this phenomenon. Furthermore, chronic morphine administration increases expression of the  $\beta$ -adrenergic receptor kinase ( $\beta$ ARK) in the rat locus coeruleus.<sup>41</sup>  $\beta$ ARK promotes desensitization of the opioid receptors by phosphorylation<sup>42</sup> and may contribute to morphine tolerance.<sup>43</sup> It will be interesting to examine the involvement of morphine-induced immediate early gene expression and AP-1 formation in the induction of  $\beta$ ARK expression by morphine.

Opioid-induced changes in gene expression may be manifested also in the immune system. Hedin *et al.*<sup>44</sup> reported that activation of the  $\delta$ -opioid receptor expressed by transfection with the cloned cDNA leads to increased *c-fos* mRNA and AP-1 complex in Jurkat T lymphocytes and results in enhancement of interleukin-2 secretion. On the other hand, it was reported that some sets of immune cells endogenously express MOR<sup>45</sup> and that administration of morphine causes an enhanced

release of interleukin-2.<sup>46</sup> It is likely that MOR activation induces interleukin-2 release *via* *c-fos* induction and AP-1 formation, similar to that with the cloned  $\delta$ -opioid receptor, because it has been shown that the intracellular signal transduction mechanism activated by MOR is essentially the same as that activated by  $\delta$ -opioid receptor.<sup>6</sup> Thus, it may be possible that administration of opioids could affect the immune system *via* AP-1-mediated transcription.

In conclusion, we showed that MOR activation induces immediate early gene expression and elevates AP-1-mediated transcriptional activity *via* ERK cascade in CHO cells. Our findings suggest that administration of opioids induces a wide range of gene-expression changes, not only in the central nervous system but also in the immune system.

The authors thank Natsumi Kikkawa and Kanako Murata (Technical Assistants, Department of Anesthesia, Kyoto University Hospital, Kyoto, Japan) for technical assistance and Etsuko Kobayashi (Secretary, Department of Anesthesia, Kyoto University Hospital) for secretarial assistance.

## References

1. Leslie FM: Methods used for the study of opioid receptors. *Pharmacol Rev* 1987; 39:197–249
2. Matthes HWD, Maldonado R, Simonin F, Valverde O, Slowe S, Kitchen I, Befort K, Dierich A, Le Meur M, Dollé P, Tzavara E, Hanoune J, Roques BP, Kieffer BL: Loss of morphine-induced analgesia, reward effect and withdrawal symptoms in mice lacking the  $\mu$ -opioid-receptor gene. *Nature* 1996; 383:819–23
3. Sora I, Takahashi N, Funada M, Ujike H, Revay RS, Donovan DM, Miner LL, Uhl GR: Opiate receptor knockout mice define  $\mu$  receptor roles in endogenous nociceptive responses and morphine-induced analgesia. *Proc Natl Acad Sci U S A* 1997; 94:1544–9
4. Jordan B, Devi LA: Molecular mechanisms of opioid receptor signal transduction. *Br J Anaesth* 1998; 81:12–9
5. Reisine T: Opiate receptors. *Neuropharmacology* 1995; 34:463–72
6. Fukuda K, Kato S, Morikawa H, Shoda T, Mori K: Functional coupling of the  $\delta$ ,  $\mu$ , and  $\kappa$ -opioid receptors to mitogen-activated protein kinase and arachidonic acid release in Chinese hamster ovary cells. *J Neurochem* 1996; 67:1309–16
7. Gutstein HB, Rubie EA, Mansour A, Akil H, Woodgett JR: Opioid effects on mitogen-activated protein kinase signaling cascades. *ANESTHESIOLOGY* 1997; 87:1118–26
8. Li LY, Chang KJ: The stimulatory effect of opioids on mitogen-activated protein kinase in Chinese hamster ovary cells transfected to express  $\mu$ -opioid receptors. *Mol Pharmacol* 1996; 50:599–602
9. van Biesen T, Luttrell LM, Hawes BE, Lefkowitz RJ: Mitogenic signaling via G protein-coupled receptors. *Endocrine Rev* 1996; 17:698–714
10. Kornhauser JM, Greenberg ME: A kinase to remember: Dual roles for MAP kinase in long-term memory. *Neuron* 1997; 18:839–42
11. Davis RJ: The mitogen-activated protein kinase signal transduction pathway. *J Biol Chem* 1993; 268:14553–6
12. Kato S, Fukuda K, Morikawa H, Shoda T, Mima H, Mori K: Adaptations to chronic agonist exposure of  $\mu$ -opioid receptor-expressing Chinese hamster ovary cells. *Eur J Pharmacol* 1998; 345:221–8
13. Mishina M, Takai T, Imoto K, Noda M, Takahashi T, Numa S, Methfessel C, Sakmann B: Molecular distinction between fetal and adult forms of muscle acetylcholine receptor. *Nature* 1986; 321:406–11
14. van Straaten F, Müller R, Curran T, Van Beveren C, Verma IM: Complete nucleotide sequence of a human *c-onc* gene: Deduced amino acid sequence of the human *c-fos* protein. *Proc Natl Acad Sci U S A* 1983; 80:3183–7
15. Perez-Albuern ED, Schattman G, Sanders LK, Nathans D: Transcriptional regulatory elements downstream of the JunB gene. *Proc Natl Acad Sci U S A* 1993; 90:11960–4
16. Nakajima-Iijima S, Hamada H, Reddy P, Kakunaga T: Molecular structure of the human cytoplasmic  $\beta$ -actin gene: Interspecies homology of sequences in the introns. *Proc Natl Acad Sci U S A* 1985; 82:6133–7
17. Feinberg AP, Vogelstein B: A technique for radiolabeling DNA restriction endonuclease fragments to high specific activity. *Anal Biochem* 1983; 132:6–13
18. Portier M, Combes T, Gully D, Maffrand JP, Casellas P: Neurotensin type 1 receptor-mediated activation of *krox24*, *c-fos* and Elk-1: Preventing effect of the neurotensin antagonists SR 48692 and SR 142948. *FEBS Lett* 1998; 432:88–93
19. Lin A, Minden A, Martinetto H, Claret FX, Lange-Carter C, Mercurio F,



- Johnson GL, Karin M: Identification of a dual specificity kinase that activates the Jun kinases and p38-Mpk2. *Science* 1995; 268:286-90
20. Guo Z, Du X, Iacovitti L: Regulation of tyrosine hydroxylase gene expression during transdifferentiation of striatal neurons: Changes in transcription factors binding the AP-1 site. *J Neurosci* 1998; 18:8163-74
21. Hodge C, Liao J, Stofega M, Guan K, Carter-Su C, Schwartz J: Growth hormone stimulates phosphorylation and activation of Elk-1 and expression of *c-fos*, *egr-1*, and *junB* through activation of extracellular signal-regulated kinases 1 and 2. *J Biol Chem* 1998; 273:31327-36
22. Goldstein A, Naidu A: Multiple opioid receptors: Ligand selectivity profiles and binding site signatures. *Mol Pharmacol* 1989; 36:265-72
23. Mansour A, Khachaturian H, Lewis ME, Akil H, Watson SJ: Anatomy of CNS opioid receptors. *Trends Neurosci* 1988; 11:308-14
24. Chakrabarti S, Prather PL, Yu L, Law PY, Loh HH: Expression of the  $\mu$ -opioid receptor in CHO cells: Ability of  $\mu$ -opioid ligands to promote  $\alpha$ -azidoanilido[ $^{32}$ P]GTP labeling of multiple G protein  $\alpha$  subunits. *J Neurochem* 1995; 64:2534-43
25. Fukuda K, Kato S, Shoda T, Morikawa H, Mima H, Mori K: Partial agonistic activity of naloxone on the opioid receptors expressed from complementary deoxyribonucleic acids in Chinese hamster ovary cells. *Anesth Analg* 1998; 87:450-5
26. Treisman R: The serum response element. *Trends Biochem Sci* 1992; 17:423-6
27. Treisman R: Identification of a protein-binding site that mediates transcriptional response of the *c-fos* gene to serum factors. *Cell* 1986; 46:567-74
28. Kitabayashi I, Kawakami Z, Matsuoka T, Chiu R, Gachelin G, Yokoyama K: Two *cis*-regulatory elements that mediate different signaling pathways for serum-dependent activation of the *junB* gene. *J Biol Chem* 1993; 268:14882-9
29. Zhang X, Blenis J, Li HC, Schindler C, Chen-Kiang S: Requirement of serine phosphorylation for formation of STAT-promoter complexes. *Science* 1995; 267:1990-4
30. Campbell GS, Meyer DJ, Raz R, Levy DE, Schwartz J, Carter-Su C: Activation of acute phase response factor (APRF)/Stat3 transcription factor by growth hormone. *J Biol Chem* 1995; 270:3974-9
31. Chang SL, Squinto SP, Harlan RE: Morphine activation of c-FOS expression in rat brain. *Biochem Biophys Res Commun* 1988; 157:698-704
32. Garcia MM, Brown HE, Harlan RE: Alterations in immediate-early gene proteins in the rat forebrain induced by acute morphine injection. *Brain Res* 1995; 692:23-40
33. Liu J, Nickolenko J, Sharp FR: Morphine induces *c-fos* and *junB* in striatum and nucleus accumbens via  $D_1$  and *N*-methyl-D-aspartate receptors. *Proc Natl Acad Sci U S A* 1994; 91:8537-41
34. Karin M: The regulation of AP-1 activity by mitogen-activated protein kinases. *J Biol Chem* 1995; 270:16483-6
35. Sonnenberg JL, Rauscher FJ III, Morgan JI, Curran T: Regulation of proenkephalin by Fos and Jun. *Science* 1989; 246:1622-5
36. Naranjo JR, Mellström B, Achaval M, Sassone-Corsi P: Molecular pathways of pain: Fos/Jun-mediated activation of a noncanonical AP-1 site in the prodynorphin gene. *Neuron* 1991; 6:607-17
37. Therrien M, Drouin J: Pituitary pro-opiomelanocortin gene expression requires synergistic interactions of several regulatory elements. *Mol Cell Biol* 1991; 11:3492-503
38. Uhl GR, Ryan JP, Schwartz JP: Morphine alters preproenkephalin gene expression. *Brain Res* 1988; 459:391-7
39. Romualdi P, Lesa G, Ferri S: Chronic opiate agonists down-regulate prodynorphin gene expression in rat brain. *Brain Res* 1991; 563:132-6
40. Chang SL, Zadina JE, Spriggs L, Squinto SP: Prolonged activation of *c-fos* and optimal activation of pro-opiomelanocortin mRNA after repeated morphine exposure in SH-SY5Y cells. *Mol Cell Neurosci* 1993; 4:25-9
41. Terwilliger RZ, Ortiz J, Guitart X, Nestler EJ: Chronic morphine administration increases  $\beta$ -adrenergic receptor kinase ( $\beta$ ARK) levels in the rat locus coeruleus. *J Neurochem* 1994; 63:1983-6
42. Yu Y, Zhang L, Yin X, Sun H, Uhl GR, Wang JB:  $\mu$  Opioid receptor phosphorylation, desensitization, and ligand efficacy. *J Biol Chem* 1997; 272:28869-74
43. Bohn LM, Gainetdinov RR, Lin FT, Lefkowitz RJ, Caron MG:  $\mu$ -Opioid receptor desensitization by  $\beta$ -arrestin-2 determines morphine tolerance but not dependence. *Nature* 2000; 408:720-3
44. Hedin KE, Bell MP, Kalli KR, Huntoon CJ, Sharp BM, McKean DJ:  $\delta$ -Opioid receptors expressed by Jurkat T cells enhance IL-2 secretion by increasing AP-1 complexes and activity of the NF-AT/AP-1-binding promoter element. *J Immunol* 1997; 159:5431-40
45. Chuang TK, Killam KF Jr, Chuang LF, Kung HF, Sheng WS, Chao CC, Yu L, Chuang RY: Mu opioid receptor gene expression in immune cells. *Biochem Biophys Res Commun* 1995; 216:922-30
46. Chuang LF, Killam KF Jr, Chuang RY: Opioid dependency and T-helper cell functions in rhesus monkey. *In Vivo* 1993; 7:159-66
